# Supplementary material for: Complete genome sequences of two strains of Treponema pallidum subsp. pertenue from Indonesia: Modular structure of several treponemal genes
Source: PubMed Central journal article supplement (PMC6197692; doi:10.1371/journal.pntd.0006867), 2018-10-10
Supplement: pntd.0006867.s007.pdf [file pntd.0006867.s007.pdf]

**S7 Table. The overview of predicted structure for module sequences in TP0856 and TP0858 genes**

| <b>Module sequence in TP0856 and TP0858</b> | <b>Structure prediction according to I-TASSER server*</b> | <b>External localization of coils</b> |
|---------------------------------------------|-----------------------------------------------------------|---------------------------------------|
| <b>r1</b>                                   | 8 aa** $\beta$ -strand, 13 aa coil                        | yes                                   |
| <b>r2</b>                                   | 8 aa $\beta$ -strand, 13 aa coil                          | yes                                   |
| <b>r3</b>                                   | 3 aa coil, 10 aa $\beta$ -strand                          | no                                    |
| <b>r4</b>                                   | 9 aa coil, 4 aa $\beta$ -strand, 1 aa coil                | yes                                   |
| <b>r5</b>                                   | 13 aa coil                                                | yes                                   |
| <b>r6</b>                                   | 13 aa coil                                                | yes                                   |
| <b>r7</b>                                   | 2 aa coil, 10 aa $\beta$ -strand                          | no                                    |
| <b>r8</b>                                   | 7 aa coil, 7 aa $\alpha$ -helix, 1 aa coil                | yes                                   |
| <b>r9</b>                                   | 9 aa coil, 5 aa $\alpha$ -helix                           | yes                                   |

\*Yang and Zhang, 2015

\*\*aa, amino acids

**References to S7 Table:**

Yang J, Zhang Y. I-TASSER server: new development for protein structure and function predictions. *Nucleic Acids Res.* 2015;43: W174-W181.
