# Supplementary material for: Complete genome sequences of two strains of Treponema pallidum subsp. pertenue from Indonesia: Modular structure of several treponemal genes
Source: PLoS Negl Trop Dis. 2018 Oct 10;12(10):e0006867. doi: 10.1371/journal.pntd.0006867 (PMC6197692; doi:10.1371/journal.pntd.0006867)
Supplement: S2 Table — (XLSX) [file pntd.0006867.s002.xlsx]

## Sheet: S2_Table
S2 Table: Next-generation sequencing statistics for TPE Sei Geringging K403 and TPE Kampung Dalan K363 genomes.
Pool	Pool coordinatea	Length (nt)a	Number of total reads	Number of reads aligned to Samoa D genome (CP002374.1)	Average read length (nt)	Depth coverage	Number of contigs aligned to Samoa D genome (CP002374.1)	N50	Average length of contigs (nt)	Total length of contigs (nt)
TPE Sei Geringging K403
Pool 1	1137018-257252	259565	927188	848593	201	657x	124	23090	2002	294412
Pool 2	256403-509923	253521	878746	812036	205	657x	92	19695	2954	298449
Pool 3	508901-763506	254606	1049276	994502	204	797x	93	19760	2883	288353
Pool 4	761216-1137483	376268	929706	885090	219	515x	87	36022	3612	419086
TPE Kampung Dalan K363
Pool 1	1137018-257252	259565	1909580	1747311	156	1050x	222	9752	1488	360287
Pool 2	256403-509923	253521	1768892	1649405	171	1113x	249	6029	1486	401326
Pool 3	508901-763506	254606	2101994	2003738	164	1291x	158	20604	2020	329274
Pool 4	761216-1137483	376268	1764656	1668859	168	745x	265	16146	2014	547948
acoordinates and pool lengths according to the Samoa D genome (CP002374.1; Čejková et al. 2012)
References to S2 Table:
Čejková D, Zobaníková M, Chen L, Pospíšilová P, Strouhal M, Qin X, et al. Whole genome sequences of three Treponema pallidum ssp. pertenue strains: yaws and syphilis treponemes differ
in less than 0.2% of the genome sequence. PLoS Negl Trop Dis. 2012;6: e1471. doi: 10.1371/journal.pntd.0001471.
